# Supplementary material for: Construction of a highly efficient MoS2-based composite electrocatalyst for the oxygen evolution reaction
Source: Royal Society of Chemistry journal article supplement (doi:10.1039/d4cy00923a), 2024-01-01
Supplement: d4cy00923a1.pdf [file d4cy00923a1.pdf]

## Construction of a Highly Efficient MoS<sub>2</sub>-Based Composite Electrocatalyst for the Oxygen Evolution Reaction

Mengyan Huang<sup>a</sup>, Bo Liu<sup>d</sup>, Junwei Wu<sup>a</sup>, Junfeng Gu<sup>b</sup>, Yichen Zheng, Peiyan Ma<sup>a,\*</sup>, Bei Li<sup>d,\*</sup>,  
and Zhengyi Fu<sup>b,c,\*</sup>

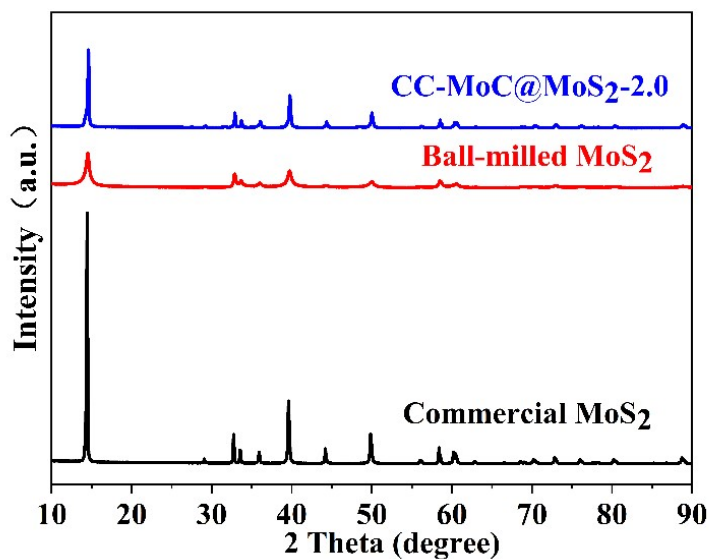

Fig. S1 XRD patterns of commercial MoS<sub>2</sub>, BM-MoS<sub>2</sub> and CC-MoC@MoS<sub>2</sub>-2.0.

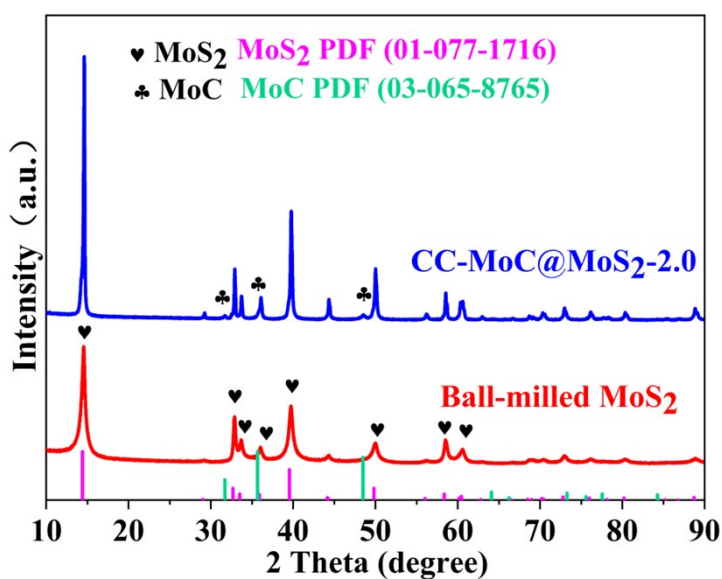

Fig. S2 XRD patterns of BM-MoS<sub>2</sub> and CC-MoC@MoS<sub>2</sub>-2.0.

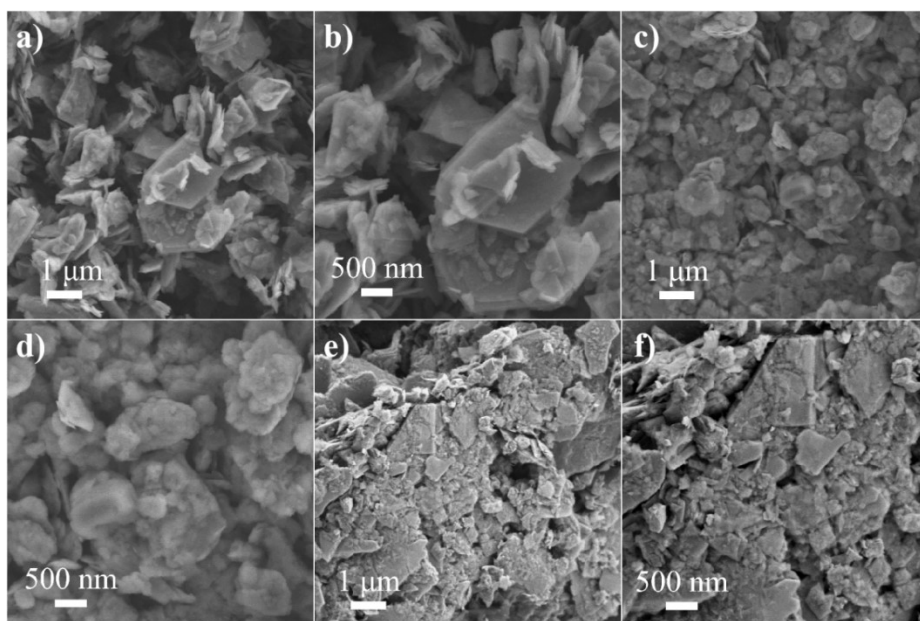

Fig. S3 SEM images of (a, b) commercial MoS<sub>2</sub>, (c, d) BM-MoS<sub>2</sub>, and (e, f) CC-MoC@MoS<sub>2</sub>-2.0.

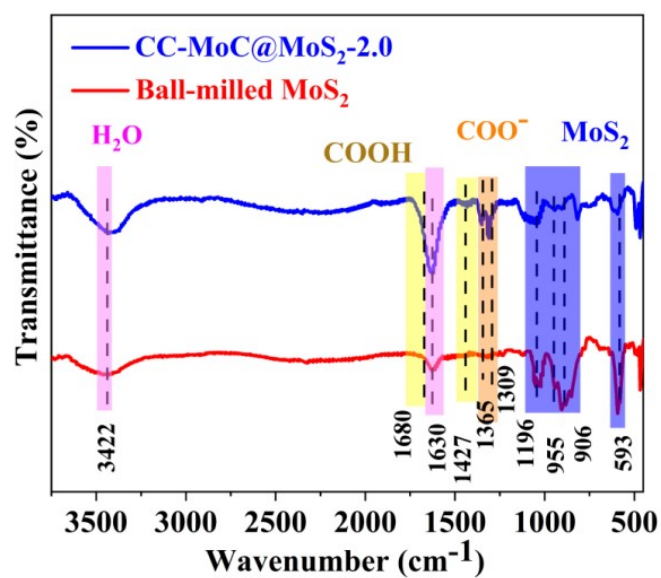

Fig. S4 FTIR spectra of BM-MoS<sub>2</sub> and CC-MoC@MoS<sub>2</sub>-2.0.

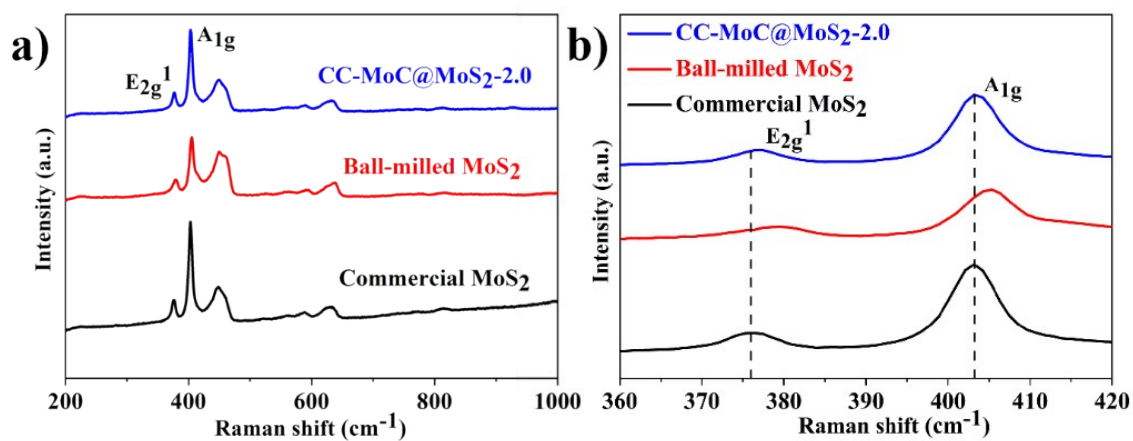

Fig. S5 Raman spectra of commercial MoS<sub>2</sub>, BM-MoS<sub>2</sub> and CC-MoC@MoS<sub>2</sub>-2.0.

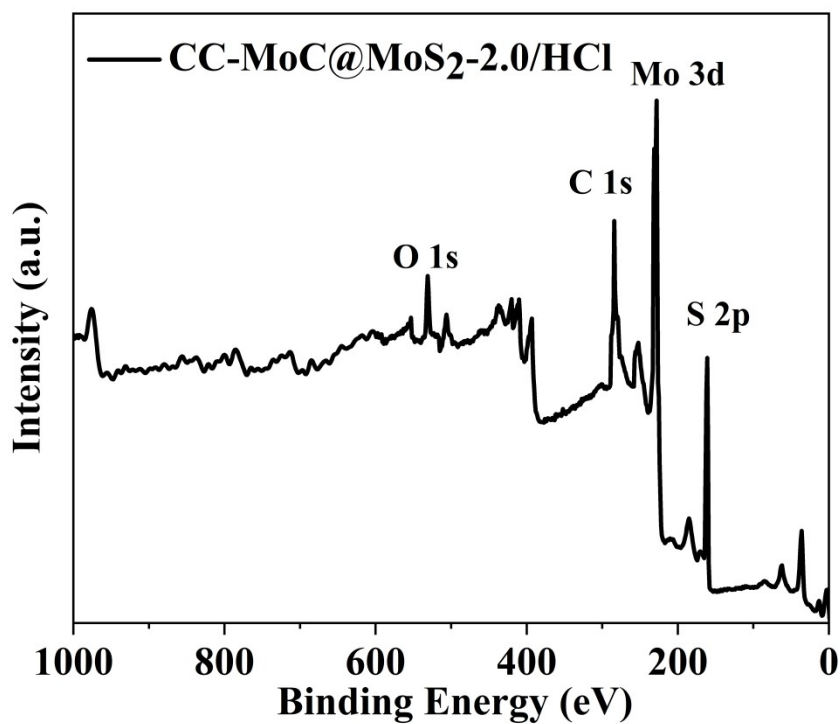

Fig. S6 XPS survey scan of CC-MoC@MoS<sub>2</sub>-2.0 after treatment in 1.0 M HCl. The S/Mo ratio is 1.7.

**Table S1:** Elemental composition (mole %) of BM-MoS<sub>2</sub> and CC-MoC@MoS<sub>2</sub>-2.0 before and after treatment in 1.0 M HCl.

|                                                  | Mo     | S      | C      | O      | S/Mo |
|--------------------------------------------------|--------|--------|--------|--------|------|
| Ball-milled MoS <sub>2</sub>                     | 24.94% | 50.28% | 1.60%  | 23.18% | 2.0  |
| CC-MoC@MoS <sub>2</sub> -2.0                     | 28.51% | 40.24% | 10.71% | 20.54% | 1.4  |
| CC-MoC@MoS <sub>2</sub> -2.0 after HCl treatment | 26.98% | 45.87% | 11.37% | 15.78% | 1.7  |

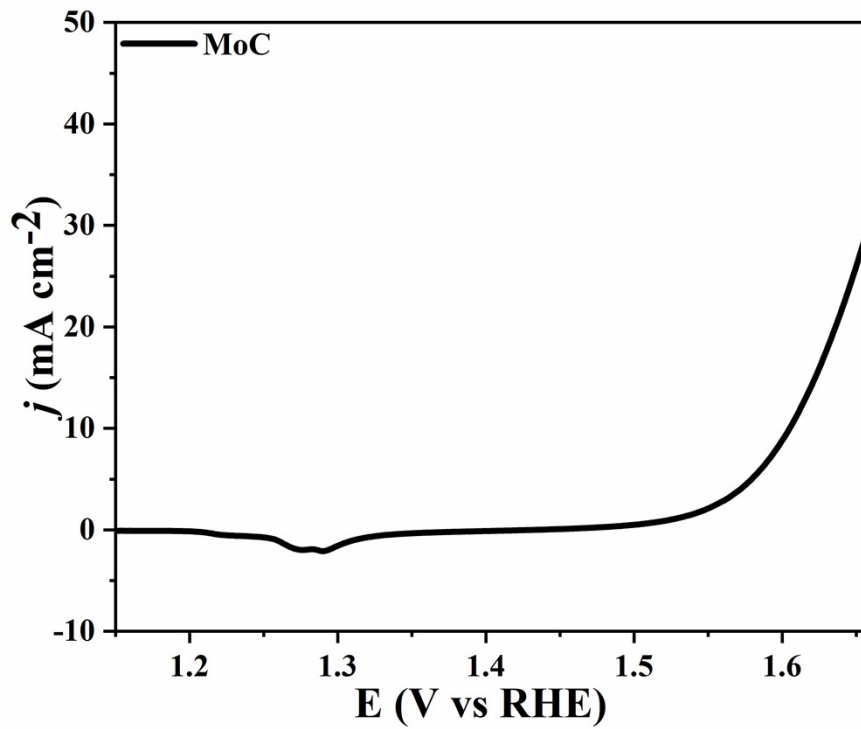

**Fig. S7** LSV curves of MoC supported on nickel foam for OER.

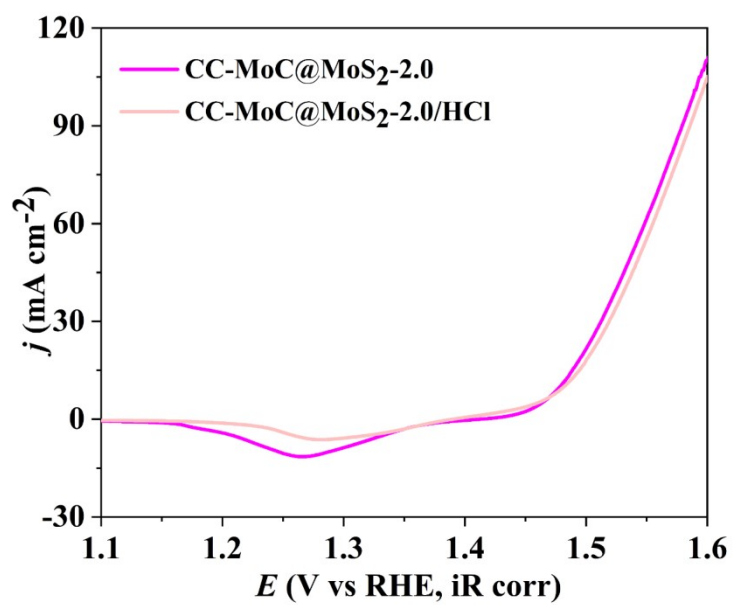

Fig. S8 LSV curves of CC-MoC@MoS<sub>2</sub>-2.0 before and after acid treatment (1.0 M HCl).

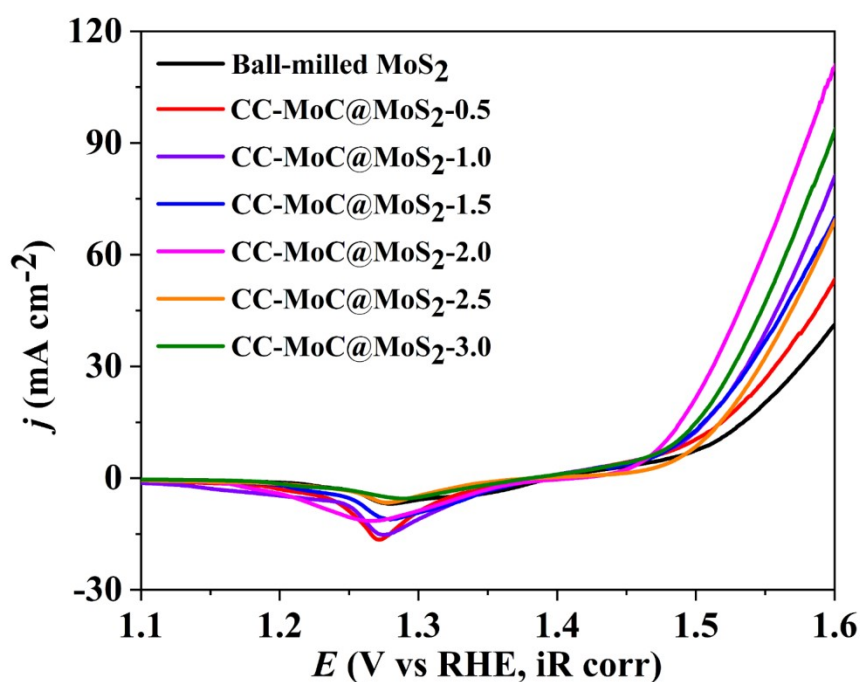

**Fig. S9** OER polarization curves of BM-MoS<sub>2</sub>, CC-MoC@MoS<sub>2</sub>-0.5, CC-MoC@MoS<sub>2</sub>-1.0, CC-MoC@MoS<sub>2</sub>-1.5, CC-MoC@MoS<sub>2</sub>-2.0, CC-MoC@MoS<sub>2</sub>-2.5 and CC-MoC@MoS<sub>2</sub>-3.0.

**Table S2:** Comparison of the OER performance of CC-MoC@MoS<sub>2</sub>-2.0 with that of reported electrocatalysts (in 1M KOH).

| Catalysts                                                                        | $\eta_{10}$<br>(mV) | Tafel slope<br>(mV dec <sup>-1</sup> ) | $C_{dl}$<br>(mF cm <sup>-2</sup> ) | $R_{ct}$<br>( $\Omega$ ) | Refs      |
|----------------------------------------------------------------------------------|---------------------|----------------------------------------|------------------------------------|--------------------------|-----------|
| CC-MoC@MoS <sub>2</sub> -2.0                                                     | 248                 | 47.09                                  | 4.02                               | 0.716                    | This work |
| Fe <sub>3</sub> O <sub>4</sub> /CoO CNTs                                         | 270                 | 59                                     | 30.07                              | 17.5                     | [1]       |
| Fe <sub>5</sub> Co <sub>4</sub> Ni <sub>20</sub> Se <sub>36</sub> B <sub>x</sub> | 279.8               | 59.5                                   | 3.25                               | 1.586                    | [2]       |
| p Ni <sub>0.7</sub> Co <sub>0.3</sub> Se <sub>2</sub> Ns                         | 258                 | 42.3                                   | 0.04                               | 32.8                     | [3]       |
| Fe-NiO <sub>x</sub> NT                                                           | 310                 | 49                                     | 22.73                              | 14.4                     | [4]       |
| Ni <sub>2</sub> P NPs                                                            | 290                 | 47                                     | 0.176                              | 1.8                      | [5]       |
| Co-Ni-Fe <sub>511</sub> Ns                                                       | 288                 | 43                                     | 0.475                              | /                        | [6]       |
| MnO <sub>2</sub> -CoP <sub>3</sub>                                               | 288                 | 65                                     | 0.091                              | /                        | [7]       |
| Fe <sub>3</sub> C@NCNTs-NCNFs                                                    | 284                 | 56                                     | 28.2                               | /                        | [8]       |
| Fe <sub>3</sub> O <sub>4</sub> -Co <sub>3</sub> S <sub>4</sub> NS                | 260                 | 56                                     | 63.2                               | /                        | [9]       |

|                                                        |       |      |       |      |      |
|--------------------------------------------------------|-------|------|-------|------|------|
| NiFeMn LDH                                             | 262   | 47   | 2.466 | /    | [10] |
| Co, Nb-MoS <sub>2</sub> /TiO <sub>2</sub>              | 260.1 | 65   | 23.7  | 0.77 | [11] |
| CoP/CN@MoS <sub>2</sub>                                | 289   | 69   | 94.7  | 17   | [12] |
| CoO <sub>x</sub> -MoC/NC                               | 330   | 89.8 | 257   | /    | [13] |
| Co <sub>9</sub> S <sub>8</sub> -CuS-FeS                | 300   | 79   | 1.51  | 26   | [14] |
| Ag@CoOOH                                               | 256   | 64.6 | /     | 2.9  | [15] |
| Carboxyl coordinated Ni/Co                             | 258   | 76.5 | /     | /    | [16] |
| Co <sub>6</sub> Mo <sub>6</sub> C <sub>2</sub> -NC-rGO | 260   | 50   | 42    | 9    | [17] |

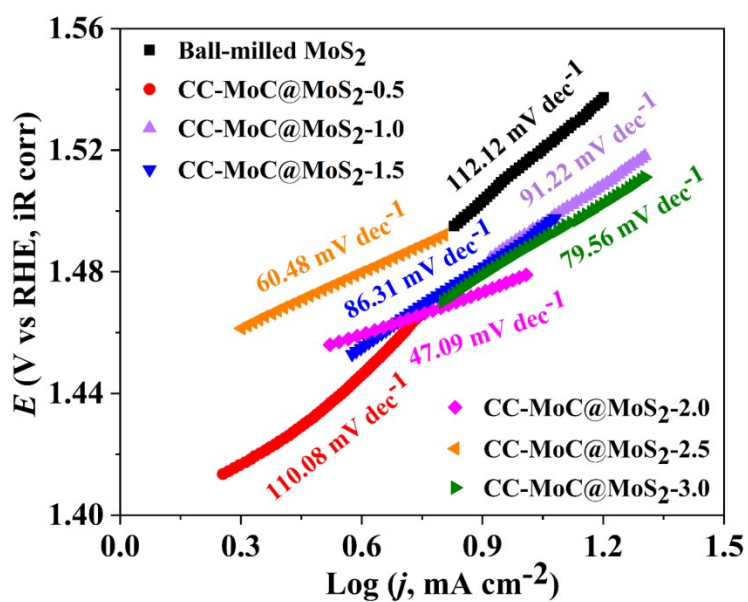

**Fig. S10** Tafel slopes of BM-MoS<sub>2</sub>, CC-MoC@MoS<sub>2</sub>-0.5, CC-MoC@MoS<sub>2</sub>-1.0, CC-MoC@MoS<sub>2</sub>-1.5, CC-MoC@MoS<sub>2</sub>-2.0, CC-MoC@MoS<sub>2</sub>-2.5 and CC-MoC@MoS<sub>2</sub>-3.0.

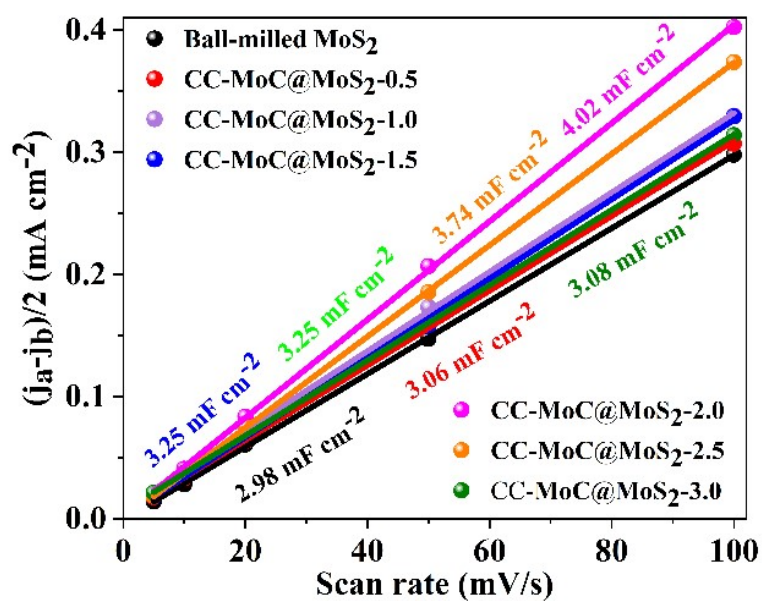

Fig. S11  $C_{dl}$  of BM-MoS<sub>2</sub>, CC-MoC@MoS<sub>2</sub>-0.5, CC-MoC@MoS<sub>2</sub>-1.0, CC-MoC@MoS<sub>2</sub>-1.5, CC-MoC@MoS<sub>2</sub>-2.0, CC-MoC@MoS<sub>2</sub>-2.5 and CC-MoC@MoS<sub>2</sub>-3.0.

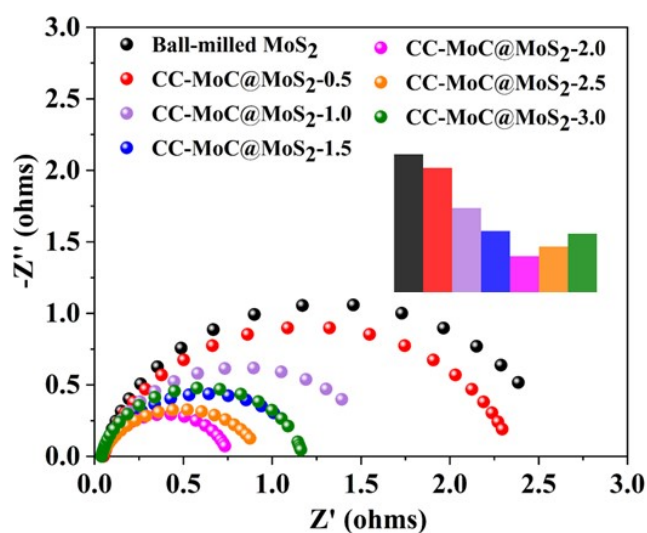

Fig. S12 The Nyquist plots of BM-MoS<sub>2</sub>, CC-MoC@MoS<sub>2</sub>-0.5, CC-MoC@MoS<sub>2</sub>-1.0, CC-MoC@MoS<sub>2</sub>-1.5, CC-MoC@MoS<sub>2</sub>-2.0, CC-MoC@MoS<sub>2</sub>-2.5 and CC-MoC@MoS<sub>2</sub>-3.0.



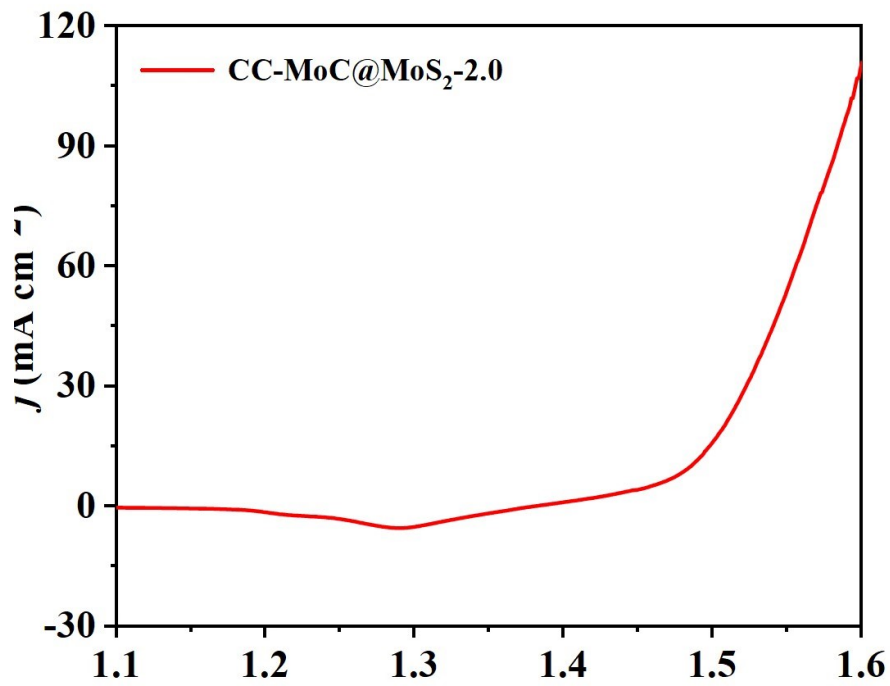

Fig. S13 LSV curve of CC-MoC@MoS<sub>2</sub>-2.0 after a continuous CV of 5000 cycles.

**Table S3:** The  $\eta_{10}$ , Tafel slope,  $C_{dl}$  and  $R_{ct}$  values for OER of BM-MoS<sub>2</sub> and CC-MoC@MoS<sub>2</sub>-X catalysts.

| Catalysts                    | $\eta_{10}$<br>(mV) | Tafel slope<br>(mV dec <sup>-1</sup> ) | $C_{dl}$<br>(mF cm <sup>-2</sup> ) | $R_{ct}$<br>( $\Omega$ ) |
|------------------------------|---------------------|----------------------------------------|------------------------------------|--------------------------|
| Ball-milled MoS <sub>2</sub> | 285                 | 112.12                                 | 2.98                               | 2.553                    |
| CC-MoC@MoS <sub>2</sub> -0.5 | 268                 | 110.08                                 | 3.06                               | 2.309                    |
| CC-MoC@MoS <sub>2</sub> -1.0 | 262                 | 91.22                                  | 3.25                               | 1.586                    |
| CC-MoC@MoS <sub>2</sub> -1.5 | 260                 | 86.31                                  | 3.25                               | 1.176                    |
| CC-MoC@MoS <sub>2</sub> -2.0 | 248                 | 47.09                                  | 4.02                               | 0.716                    |
| CC-MoC@MoS <sub>2</sub> -2.5 | 275                 | 60.48                                  | 3.74                               | 0.898                    |
| CC-MoC@MoS <sub>2</sub> -3.0 | 257                 | 79.56                                  | 3.08                               | 1.131                    |

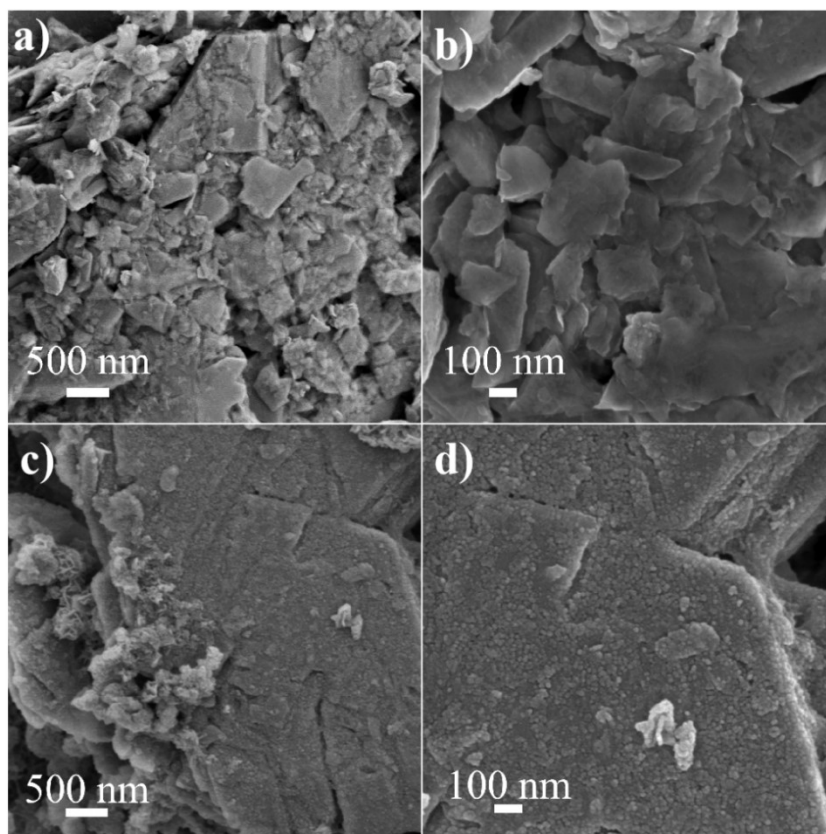

Fig. S14 SEM images of CC-MoC@MoS<sub>2</sub>-2.0 (a, b) before and (c, d) after stability test.

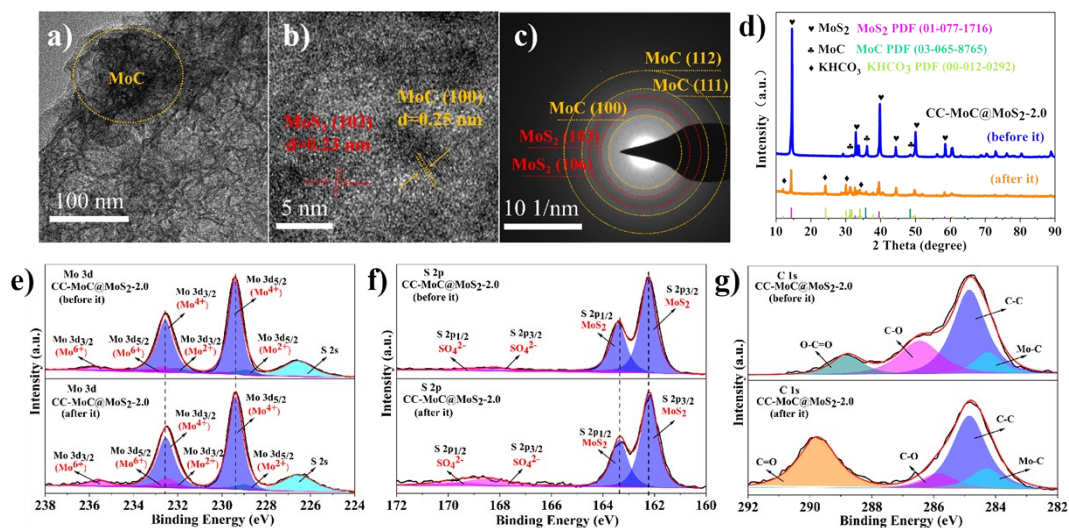

Fig. S15 (a, b) TEM images and (c) SAED pattern of CC-MoC@MoS<sub>2</sub>-2.0 after stability test. (d) XRD patterns and XPS spectra of (e) Mo 3d, (f) S 2p, (g) C 1s of CC-MoC@MoS<sub>2</sub>-2.0 before and after stability test.

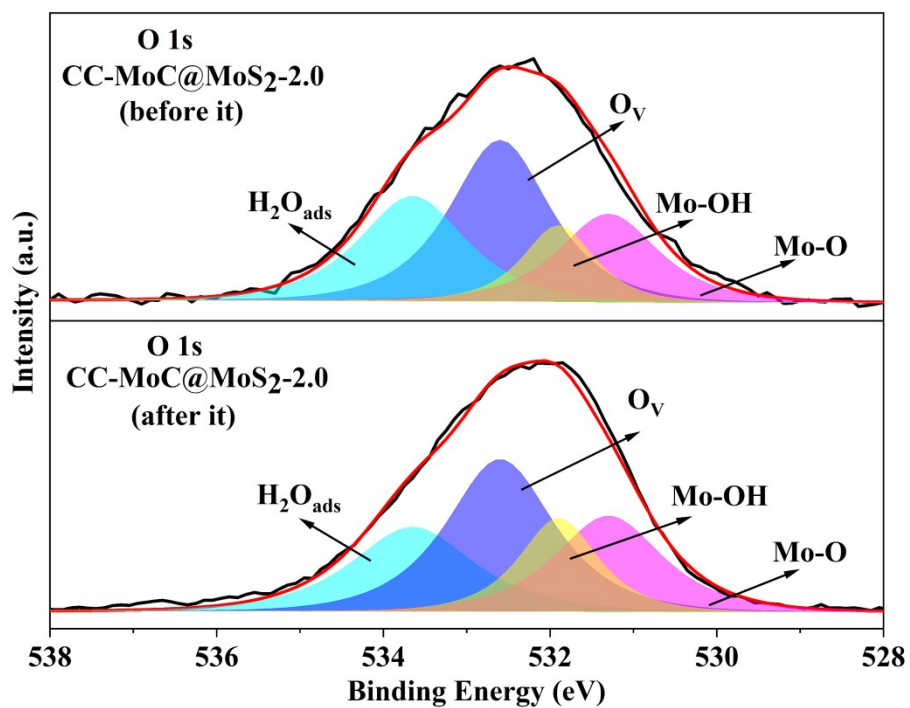

Fig. S16 High-resolution XPS spectra of O 1s of CC-MoC@MoS<sub>2</sub>-2.0 before and after stability test.

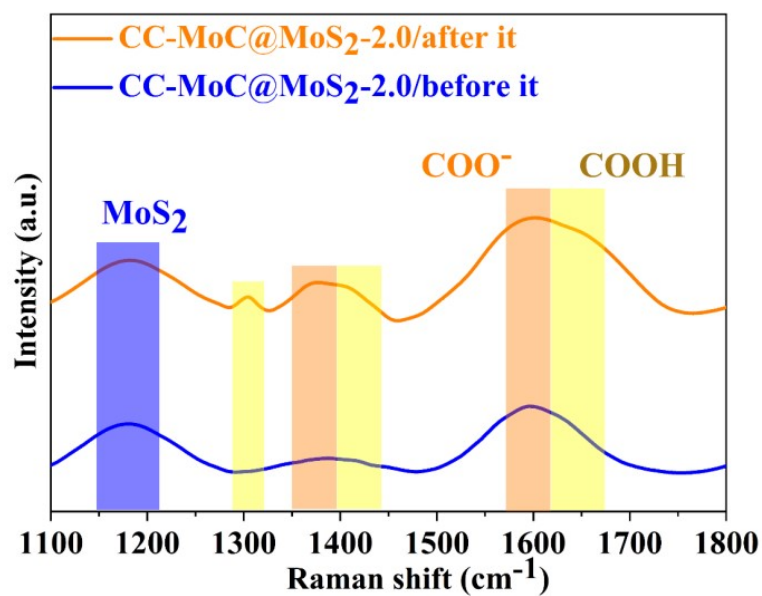

Fig. S17 Raman spectra of CC-MoC@MoS<sub>2</sub>-2.0 before and after stability test.

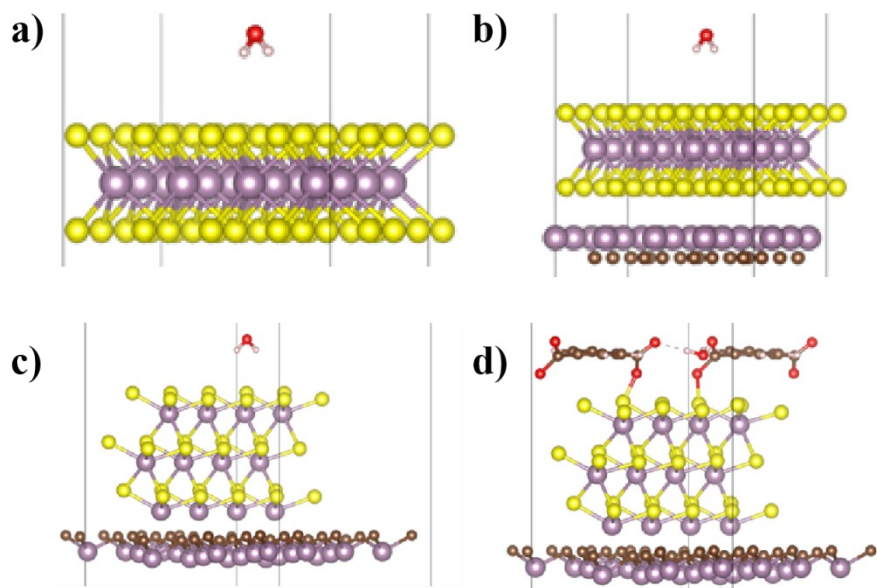

Fig. S18 Water adsorption models of (a) MoS<sub>2</sub>, (b) MoC@MoS<sub>2</sub>-I, (c) MoC@MoS<sub>2</sub>-II and (d) CC-MoC@MoS<sub>2</sub>-

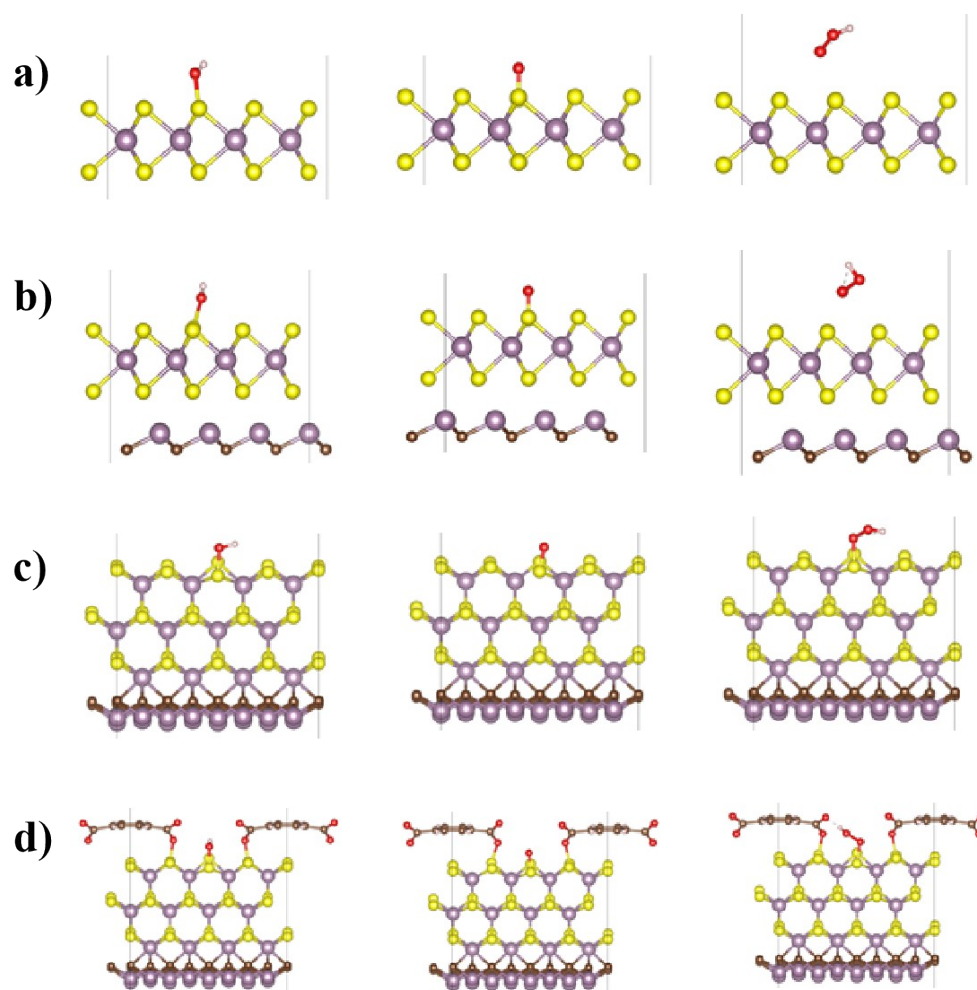

**Fig. S19** Theoretical structural models of clean surfaces and \*OH, \*O, \*OOH intermediates adsorbed on the surfaces of a) MoS<sub>2</sub>, b) MoC@MoS<sub>2</sub>-I, c) MoC@MoS<sub>2</sub>-II and d) CC-MoC@MoS<sub>2</sub>.

**Table S4:** The calculated  $E^*$ (eV), Gibbs free energy change  $\Delta_r G$ (eV) and theoretical overpotential  $\eta$ (eV) values of the OER performance (calibration at 298.15 K, the unit of physical quantity is eV, U = 0 V).

| System                           | $E^*$   | $G_{\text{H}_2\text{O}}$ | $G_{\text{H}_2}$ | $G_{\text{O}_2}$ | $\Delta_r G_1$ | $\Delta_r G_2$ | $\Delta_r G_3$ | $\Delta_r G_4$ | $\eta$ |
|----------------------------------|---------|--------------------------|------------------|------------------|----------------|----------------|----------------|----------------|--------|
| MoS <sub>2</sub>                 | -364.73 |                          |                  |                  | 1.40           | -              | -              | -              | -      |
| MoC@MoS <sub>2</sub> -I          | -661.31 |                          |                  |                  | 1.11           | -              | -              | -              | -      |
| MoC@MoS <sub>2</sub> -II         | -696.01 | -14.22                   | -6.80            | -9.92            | -0.47          | -0.26          | 1.03           | -0.30          | 1.03   |
| CC-MoC@MoS <sub>2</sub> -<br>2.0 | -809.10 |                          |                  |                  | -0.11          | -0.53          | 0.94           | -0.30          | 0.94   |

**Table S5:** The energies of proton generation and migration of different electrocatalysts calculated by CI-NEB method.

| System                   | Reaction          | $E_{\text{transition}}$ (eV) |
|--------------------------|-------------------|------------------------------|
| MoC@MoS <sub>2</sub> -II | Proton generation | 0.47                         |
| CC-MoC@MoS <sub>2</sub>  |                   | 0.42                         |
| MoC@MoS <sub>2</sub> -II | Proton transfer   | 0.84                         |
| CC-MoC@MoS <sub>2</sub>  |                   | 0.72                         |

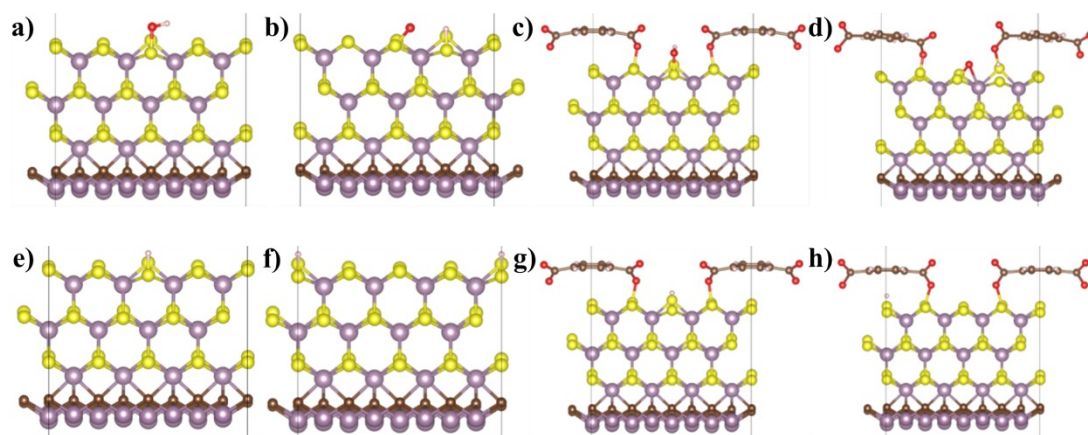

**Fig. S20** Schematic illustration of the proposed proton transfer processes of MoC@MoS<sub>2</sub>-II and CC-MoC@MoS<sub>2</sub>-2.0. The initial and final proton generation states of MoC@MoS<sub>2</sub>-II (a, b) and CC-MoC@MoS<sub>2</sub>-2.0 (c, d). The initial and final states of proton migration of MoC@MoS<sub>2</sub>-II (e, f) and CC-MoC@MoS<sub>2</sub>-2.0 (g, h).

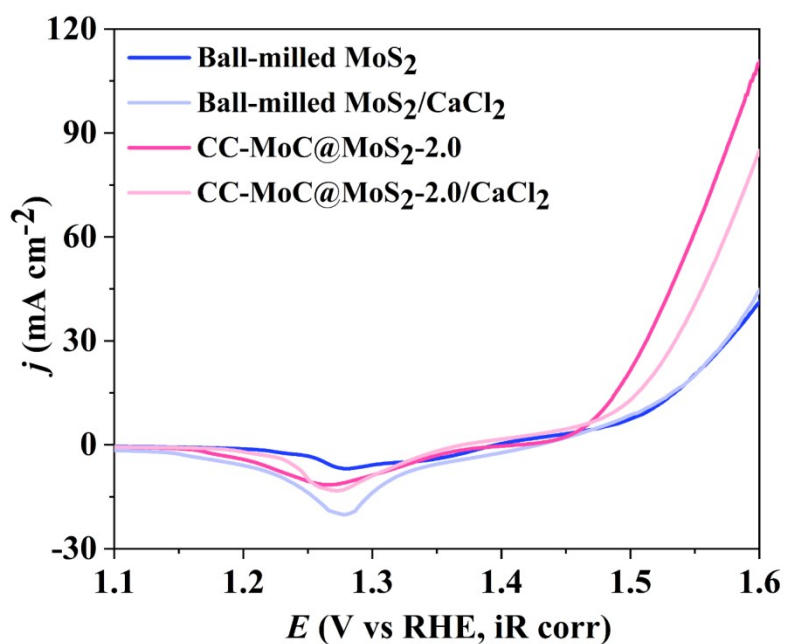

Fig. S21 LSV curves of BM-MoS<sub>2</sub> and CC-MoC@MoS<sub>2</sub>-2.0 with and without CaCl<sub>2</sub> in the electrolyte.

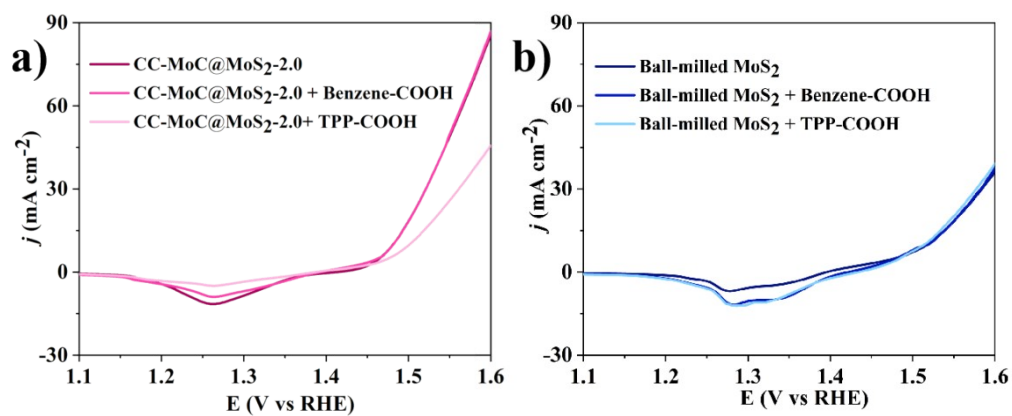

Fig. S22 LSV curves of (a) CC-MoC@MoS<sub>2</sub>-2.0 and (b) BM-MoS<sub>2</sub> catalysts in 1 M KOH with the titration of 5 mM TPP-COOH or Benzene-COOH.

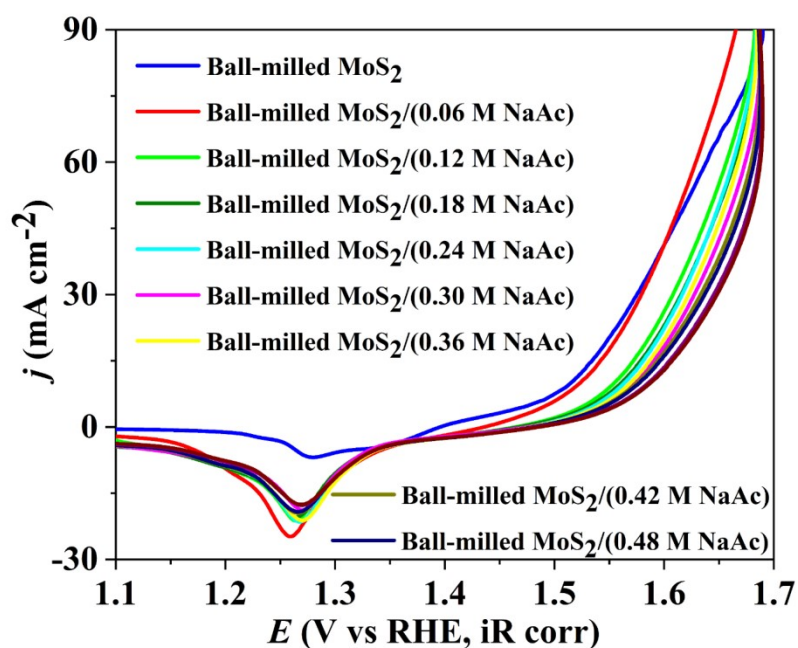

Fig. S23 LSV curves of BM-MoS<sub>2</sub> catalysts in 1 M KOH with NaAc solutions of different concentrations.

## References

- [1] Y.Luo, H.Yang, P.Ma, S.Luo, Z.Zhao, J.Ma, Fe<sub>3</sub>O<sub>4</sub>/CoO interfacial nanostructure supported on carbon nanotubes as a highly efficient electrocatalyst for oxygen evolution reaction, ACS Sustainable Chem. Eng. 8 (2020)3336-3346.
- [2] Y.Zuo, D.Rao, S.Ma, T.Li, Y. H.Tsang, S.Kment, Y.Chai, Valence engineering via dual-cation and boron doping in pyrite selenide for highly efficient oxygen evolution, ACS Nano 13(2019)11469-11476.
- [3] X. Wang, Y.Zheng, J.Yuan, J.Shen, J.Hu, A.j.Wang, L.Wu, L.Niu, Porous NiCo diselenide nanosheets arrayed on carbon cloth as promising advanced catalysts used in water splitting, Electrochim. Acta 225(2017) 503-513.
- [4] G.Wu, W.X.Chen,X.S. Zheng,D.P. He,Y.Q. Luo, X.Q.Wang, J.Yang, Y.E.Wu, W.S.Yan, Z.B.Zhuang, X.Hong,Y.D. Li, Hierarchical Fe-doped NiO<sub>x</sub> nanotubes assembled from ultrathin nanosheets containing trivalent nickel for oxygen evolution reaction, Nano Energy 38(2017)167-174.
- [5] L.A.Stern, L.Feng, F.Song, X.Hu, Ni<sub>2</sub>P as a Janus catalyst for water splitting: the oxygen evolution activity of Ni<sub>2</sub>P nanoparticles, Energy Environ. Sci. 8(2015)2347-2351.
- [6] G. Zeng, M.Liao, C.Zhou, X.Chen, Y.Wang, D.Xiao, Iron and nickel co-doped cobalt hydroxide nanosheets with enhanced activity for oxygen evolution reaction,RSC Adv.6(2016)42255-42262.
- [7] X.Xiong, Y.Ji, M.Xie, C.You, L.Yang, Z.Liu, A. M. Asiri, X.Sun, MnO<sub>2</sub>-CoP<sub>3</sub> nanowires array: an efficient electrocatalyst for alkaline oxygen evolution reaction with enhanced activity, Electrochem. Commun. 86(2018)161-165.
- [8] Y.Zhao, J.Zhang, X.Guo, H.Fan, W.Wu, H.Liu, G.Wang, Fe<sub>3</sub>C@Nitrogen doped CNT arrays



- aligned on nitrogen functionalized carbon nanofibers as highly efficient catalysts for the oxygen evolution reaction, *J. Mater. Chem. A* 5(2017) 19672-19679.
- [9] J.Du, T.Zhang, J.Xing, C.Xu, Hierarchical porous Fe<sub>3</sub>O<sub>4</sub>/Co<sub>3</sub>S<sub>4</sub> nanosheets as an efficient electrocatalyst for the oxygen evolution reaction, *J. Mater. Chem. A* 5(2017)9210-9216.
- [10] D. C.Nguyen, T. L.Luyen Doan, S.Prabhakaran, D. T.Tran, D. H.Kim, J. H.Lee, N. H.Kim, Hierarchical Co and Nb dual-doped MoS<sub>2</sub> nanosheets shelled micro-TiO<sub>2</sub> hollow spheres as effective multifunctional electrocatalysts for HER, OER, and ORR, *Nano Energy* 82(2021)105750.
- [11]Z.Lu, L.Qian, Y.Tian, Y.Li, X.Sun, X.Duan, Ternary NiFeMn layered double hydroxides as highly-efficient oxygen evolution catalysts, *Chem.Comm.* 52(2016)908-911.
- [12]J.G.Li, K.Xie, H.Sun, Z.Li, X.Ao, Z.Chen, K. K.Ostrikov, C.Wang, W.Zhang, Template-directed bifunctional dodecahedral CoP/CN@MoS<sub>2</sub> electrocatalyst for high efficient water splitting, *ACS Appl. Mater. Interfaces* 11(2019)36649-36657.
- [13]T.Huang, Y.Chen, J.M.Lee, A microribbon hybrid structure of CoO<sub>x</sub>-MoC encapsulated in N-doped carbon nanowire derived from MOF as efficient oxygen evolution electrocatalysts. *Small* 13(2017) 1702753.
- [14]S.Zhang, Y.Sun, F.Liao, Y.Shen, H.Shi, M.Shao, Co<sub>9</sub>S<sub>8</sub>-CuS-FeS trimetal sulfides for excellent oxygen evolution reaction electrocatalysis, *Electrochim. Acta* 283(2018)1695-1701.
- [15]. C.Lee, K.Shin, C.Jung, P.P.Choi, G.Henkelman, H. M.Lee, Atomically embedded Ag via electrodiffusion boosts oxygen evolution of CoOOH nanosheet arrays, *ACS Catal.* 10(2020) 562-569.
- [16] J.Chen, H.Zhang, B.Li, J.Yang, X.Li, T.Zhang, C.He, C.Duan, L.Wang, Bioinspired carboxylate–water coordination polymers with hydrogen-bond clusters and local coordination flexibility for electrochemical water splitting, *ACS Appl. Energy Mater.* 3(2020) 10515-10524.
- [17]Y.J.Tang, C.H. Liu, W.Huang, X.L Wang, L.Z.Dong, S.L.Li, Y.Q.Lan, Bimetallic carbides-based nanocomposite as superior electrocatalyst for oxygen evolution reaction, *ACS Appl. Mater. Interfaces* 9(2017)16977-16985.
